# Supplementary material
Source: PubMed Central journal article supplement (PMC5850519)
Supplement: cix518_suppl_supplementary_table_s1.pdf [file cix518_suppl_supplementary_table_s1.pdf]

**Table S1. Intrahost Single Nucleotide Variant (iSNV) frequencies.** For samples with coverage > 30X, we determined the iSNV frequencies of (F90F; C739T) in the *NP* gene and one transient iSNV (T1186T; T15138C) in the *L* gene. Serum samples underwent unbiased sequencing, PBLs underwent hybrid selection with EBOV-specific baits, and the semen underwent both techniques. We additionally performed single molecule tagged amplicon sequencing to generate higher coverage of the C739T iSNV, (primers listed in Suppl Table 1) which sequences the viral genomic RNA (vRNA) and complementary antigenomic and messenger RNA (c/mRNA) strands independently.

| Day      | Sample Type | Method           | strand | iSNV freq (%)       | SE(%)    | 95% CI           |
|----------|-------------|------------------|--------|---------------------|----------|------------------|
| 7        | Serum       | Unbiased         | both   | 10.85%              | 2.14%    | (6.66%, 15.04%)  |
|          |             | Amplicon         | c/mRNA | 8.21%               | 0.36%    | (7.52%, 8.91%)   |
|          |             | Amplicon         | vRNA   | 6.33%               | 1.07%    | (4.24%, 8.43%)   |
|          | PBLs        | Hybrid Capture   | both   | 3.72%               | 1.29%    | (1.19%, 6.25%)   |
|          |             | Amplicon         | c/mRNA | 8.18%               | 0.39%    | (7.42%, 8.95%)   |
|          |             | Amplicon         | vRNA   | 7.60%               | 0.35%    | (6.92%, 8.29%)   |
| 8        | Serum       | Unbiased         | both   | 4.56%               | 1.11%    | (2.38%, 6.74%)   |
|          |             | Amplicon         | c/mRNA | 8.10%               | 0.31%    | (7.5%, 8.7%)     |
|          |             | Amplicon         | vRNA   | 6.35%               | 0.37%    | (5.63%, 7.07%)   |
|          | PBLs        | Hybrid Capture   | both   | 6.41%               | 1.47%    | (3.54%, 9.28%)   |
|          |             | Amplicon         | c/mRNA | 8.06%               | 0.41%    | (7.26%, 8.85%)   |
|          |             | Amplicon         | vRNA   | 7.55%               | 0.37%    | (6.83%, 8.28%)   |
| 9        | Serum       | Unbiased         | both   | 5.21%               | 1.23%    | (2.8%, 7.62%)    |
|          |             | Amplicon         | c/mRNA | 7.69%               | 0.31%    | (7.08%, 8.29%)   |
|          |             | Amplicon         | vRNA   | 6.04%               | 0.94%    | (4.2%, 7.87%)    |
|          | PBLs        | Hybrid Capture   | both   | 5.91%               | 1.73%    | (2.52%, 9.3%)    |
|          |             | Amplicon         | c/mRNA | 7.23%               | 0.47%    | (6.3%, 8.15%)    |
|          |             | Amplicon         | vRNA   | 7.19%               | 0.34%    | (6.54%, 7.85%)   |
| 10       | Serum       | Unbiased         | both   | 5.80%               | 1.62%    | (2.62%, 8.98%)   |
|          |             | Amplicon         | c/mRNA | 4.62%               | 0.43%    | (3.78%, 5.46%)   |
|          |             | Amplicon         | vRNA   | 6.99%               | 0.59%    | (5.83%, 8.15%)   |
|          | PBLs        | Hybrid Capture   | both   | 9.76%               | 4.63%    | (0.68%, 18.84%)  |
|          |             | Amplicon         | c/mRNA | 4.62%               | 0.43%    | (3.78%, 5.46%)   |
|          |             | Amplicon         | vRNA   | 6.99%               | 0.59%    | (5.83%, 8.15%)   |
| 32       | Semen       | Mixed            | both   | 0.72%               | 0.51%    | [0%, 1.72%]      |
|          |             | Amplicon         | c/mRNA | 3.02%               | 0.53%    | (1.97%, 4.07%)   |
|          |             | Amplicon         | vRNA   | 4.53%               | 0.73%    | (3.11%, 5.96%)   |
| 66       | Semen       | Mixed            | both   | not enough coverage |          |                  |
|          |             | Amplicon         | c/mRNA | 0.24%               | 0.24%    | [0%, 0.71%]      |
|          |             | Amplicon         | vRNA   | 0.00%               | 0.00%    | [0%, 0%]         |
| 110      | Semen       | Mixed            | both   | not enough coverage |          |                  |
|          |             | Amplicon         | c/mRNA | not enough coverage |          |                  |
|          |             | Amplicon         | vRNA   | not enough coverage |          |                  |
| All days | Serum       | Unbiased         | both   | 0.00%               | 0.00%    | [0%, 0%]         |
| All days | PBLs        | Hybrid Selection | both   | [0%, 0%]            | [0%, 0%] | [0%, 0%]         |
| 32       | Semen       | Mixed            | both   | 25.56%              | 3.78%    | (18.15%, 32.98%) |
| 66       |             | Mixed            | both   | [0%, 0%]            | [0%, 0%] | [0%, 0%]         |

**Table S2. Primers.** Primer sets used and for EBOV detection (orange), human 18s detection (blue) and the stranded amplicon analysis (green and purple).

| Name                   | Sequence (5' to 3')                                        | Design                                 | Reference  |
|------------------------|------------------------------------------------------------|----------------------------------------|------------|
| F565                   | TCTGACATGGATTACCACAAGATC                                   | Kulesh NP, anneals to vRNA; 76 bp      | 13         |
| R640                   | GGATGACTCTTTGCCGAACAATC                                    | Kulesh NP, anneals to cRNA; 76 bp      | 13         |
| AG4233_18S1            | TCCTTTAACGAGGATCCATTGG                                     | For qPCR of 18S, 101 bp amplicon       | 6          |
| AG4234_18S1            | CGAGCTTTTAACTGCAGCAACT                                     | For qPCR of 18S, 101 bp amplicon       | 6          |
| RA3v2-UMI-EBOV-739-fwd | TTCTACAGTCCGACGATCNNNNNN<br>GCTTTGTCTTCATCATGCGTACCA       | 5'-RA3v2-N6-(KJ660346.2 697 to 809)-3' | This Study |
| RA3v2-UMI-EBOV-739-rev | TTCTACAGTCCGACGATCNNNNNN<br>CTCCATCACGCTTCTTGACTTCA        | 5'-RA3v2-N6-(KJ660346.2 697 to 809)-3' | This Study |
| RA5v2-UMI-EBOV-739-fwd | CCTTGGCACCCGAGAATTCANNN<br>NNNGCTTTGTCTTCATCATGCGTAC<br>CA | 5'-RA5v2-N6-(KJ660346.2 697 to 809)-3' | This Study |
| RA5v2-UMI-EBOV-739-rev | CCTTGGCACCCGAGAATTCANNN<br>NNNCTCCATCACGCTTCTTGACTT<br>CA  | 5'-RA5v2-N6-(KJ660346.2 697 to 809)-3' | This Study |
| NP-vRNA-fwd            | TCATGCGTACCAAGGAGATTAC                                     |                                        | This Study |
| NP-vRNA-probe          | TCAAGTATTTGGAAGGGCACGGGT                                   |                                        | This Study |
| NP-vRNA-rev            | GCTTCACTCCATCACACTTCT                                      |                                        | This Study |
| NP-cmRNA-fwd           | GCGTTAAGCCACAGTTATAGCC                                     |                                        | This Study |
| NP-cmRNA-probe         | TGGTAACTCAATATCTTAGCCAGC<br>GA                             |                                        | This Study |
| NP-cmRNA-rev           | GGGCAGGCTAGTAGGTAAGTTAT                                    |                                        | This Study |
