# Supplementary material
Source: PubMed Central journal article supplement (PMC5850519)

# Figure S1

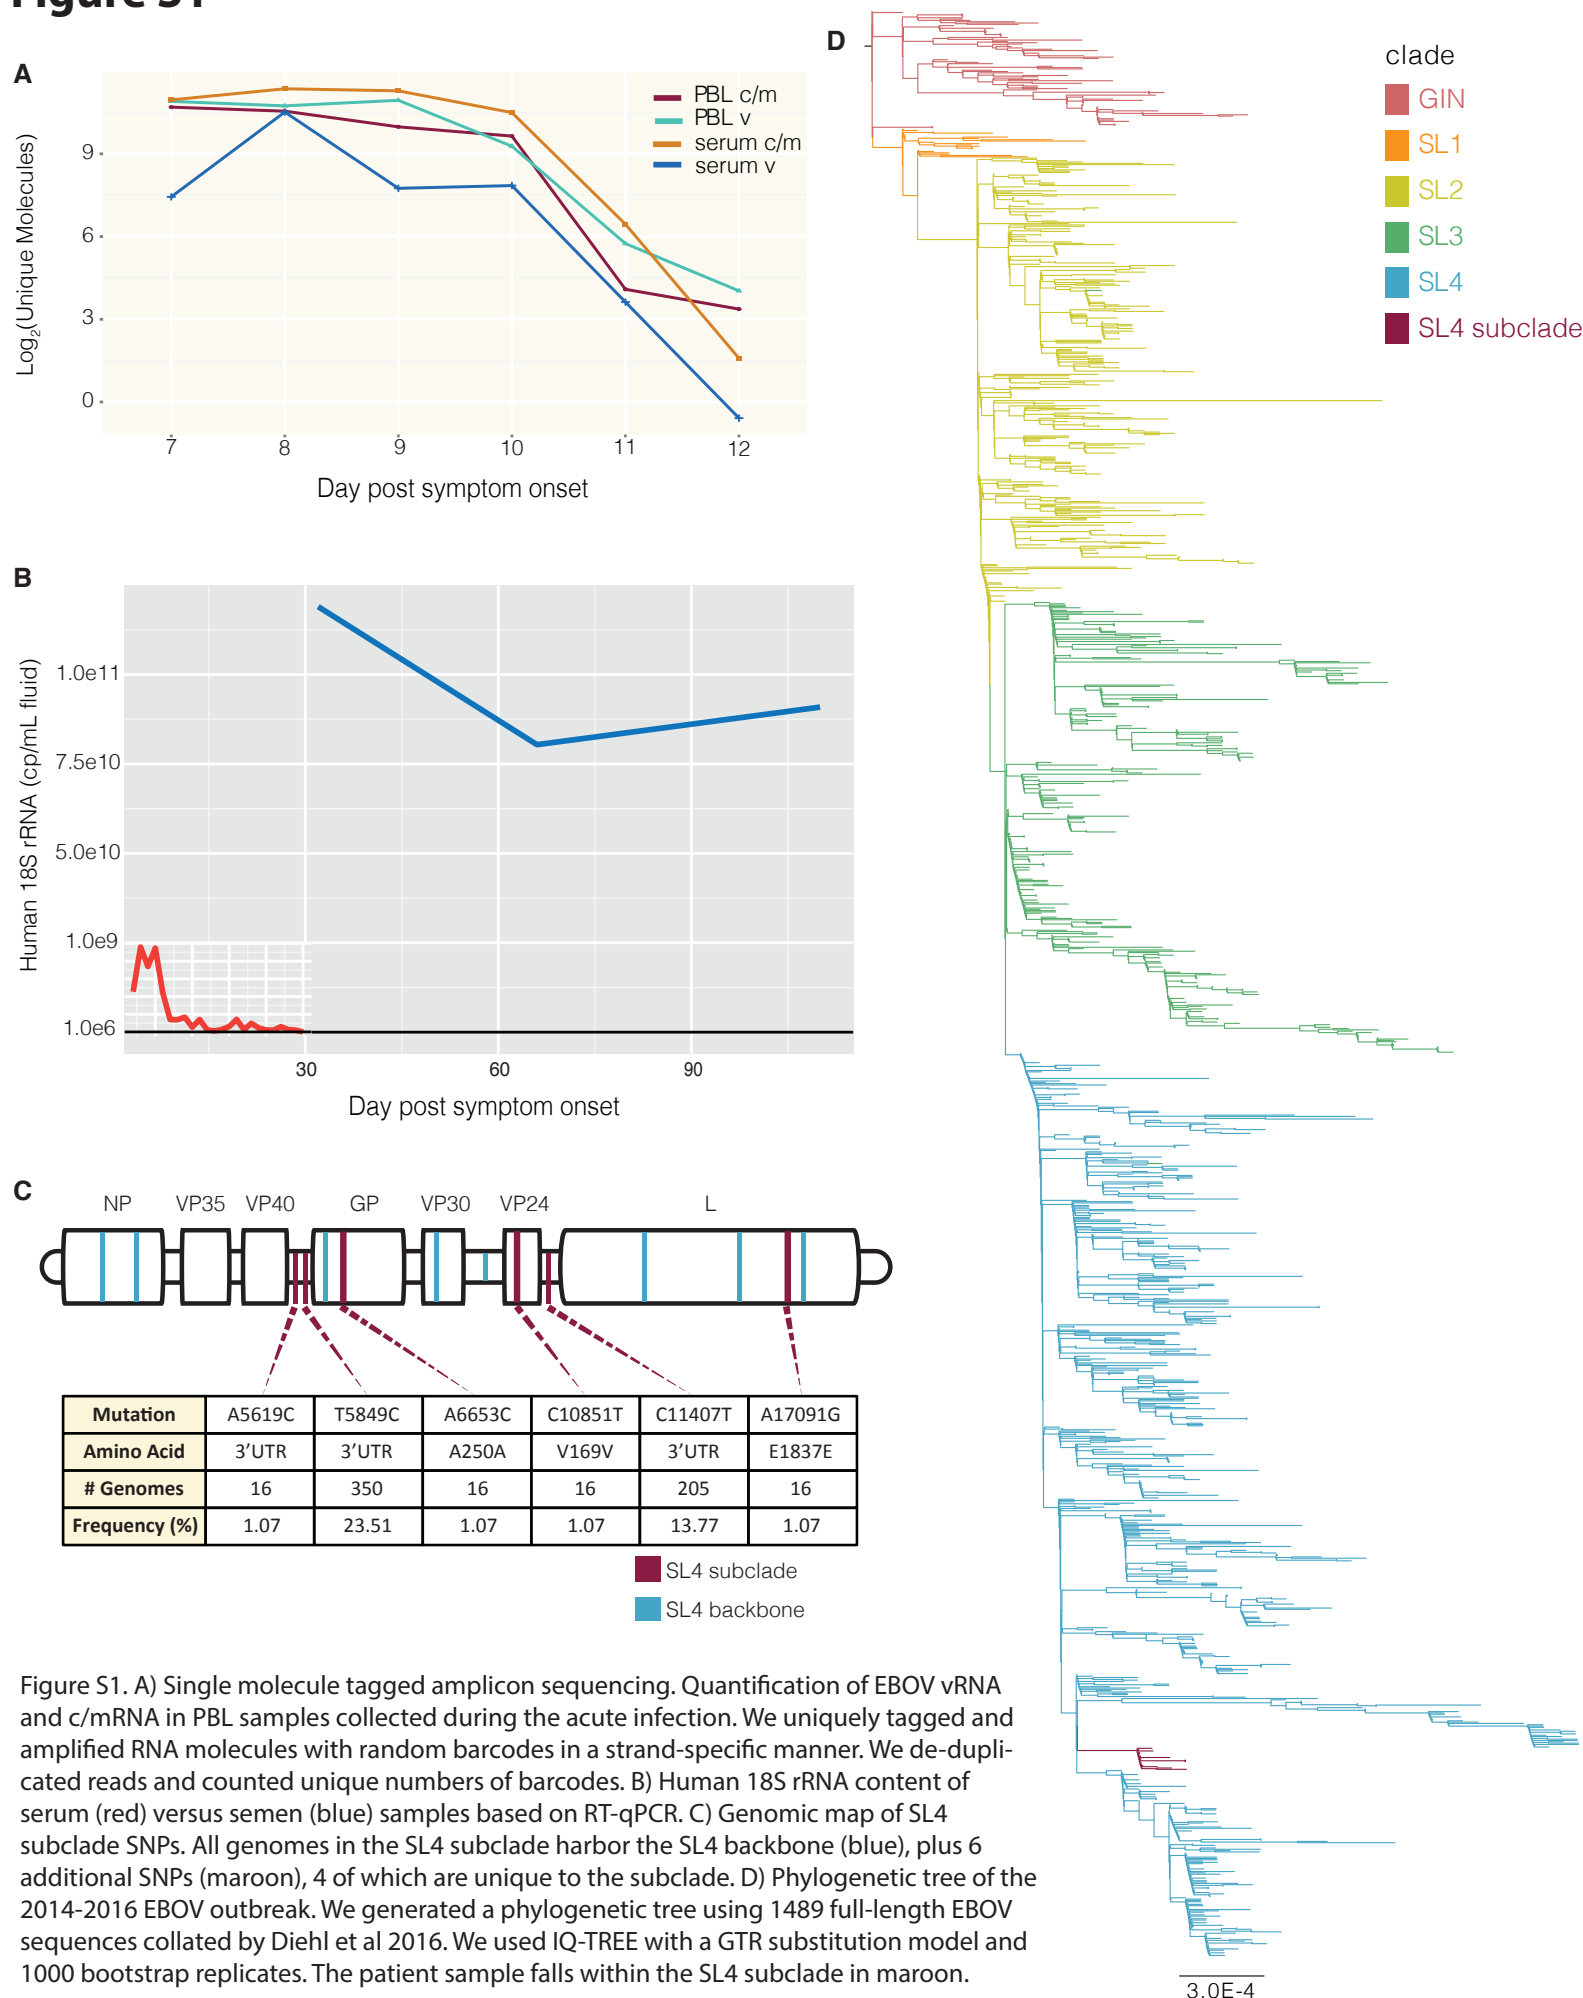

Supplement: cix518_suppl_supplementary_figure_s1.pdf [file cix518_suppl_supplementary_figure_s1.pdf]
